# Supplementary material for: The preprotein translocase YidC controls respiratory metabolism in Mycobacterium tuberculosis
Source: PubMed Central journal article supplement (PMC4863248; doi:10.1038/srep24998), 2016-05-11
Supplement: srep24998-s1.pdf [file srep24998-s1.pdf]

## **SUPPLEMENTARY INFORMATION**

### **The preprotein translocase YidC controls respiratory metabolism in *Mycobacterium tuberculosis***

Preeti Thakur<sup>1,2</sup>, Nagavara Prasad Gantasala<sup>3</sup>, Eira Choudhary<sup>1,4</sup>, Nirpendra Singh<sup>3</sup>, Malik Zainul Abdin<sup>2</sup> and Nisheeth Agarwal\*<sup>1</sup>

**Keywords:** Preprotein translocase; *Mycobacterium tuberculosis*; respiration, ATP synthesis.

#### **\*Corresponding Author**

#### **Address for Correspondence:**

Translational Health Science and Technology Institute,  
NCR Biotech Science Cluster,  
3rd Milestone, Faridabad–Gurgaon Expressway,  
Faridabad- 121001 India

#### **Affiliation:**

**1.** Translational Health Science and Technology Institute,  
NCR Biotech Science Cluster,  
3rd Milestone, Faridabad–Gurgaon Expressway,  
Faridabad- 121001 India

**2.** Faculty of Science,  
Jamia Hamdard,  
Hamdard Nagar,  
New Delhi-110062, India

**3.** Regional Center for Biotechnology,  
NCR Biotech Science Cluster,  
3rd Milestone, Faridabad–Gurgaon Expressway,  
Faridabad- 121001 India

**4.** Symbiosis School of Biomedical Sciences,  
Symbiosis International University,  
Lavale,  
Pune- 412115 (Maharashtra) India

|          |       |                                                       |   |     |
|----------|-------|-------------------------------------------------------|---|-----|
|          |       | 1                                                     |   | 50  |
| YidC2_BH | (1)   | MNYMKRRLLLFAGILLLVALAGCSTTDPITSESEGIWNHFFVYPMSWLIT    |   |     |
| YidC_MT  | (1)   | -----VSLLFDFDFSLDFIYYPVSWIMWVWYRLFVFLGPSN-            |   |     |
|          |       | 51                                                    |   | 100 |
| YidC2_BH | (51)  | TVANLLNGSYGLSIIIVTILIRLALLPLTLKQKSMRAMQVIRPEMEAIQ     |   |     |
| YidC_MT  | (37)  | -----FFAWALSVMFLVFTLRALLYKPFVVRQIRTTROMQELQPQIKALQ    |   |     |
|          |       |                                                       | * | *   |
|          |       | 101                                                   |   | 150 |
| YidC2_BH | (101) | KKYKEKGSKDPKVQEMQKELLGLYQKHGVNPMAGCLPLFIQLPIILMAFY    |   |     |
| YidC_MT  | (81)  | KKYG-----KDRQRMALQMQLQREHGFNPILGCLPMLAQIPVFLGLY       |   |     |
|          |       |                                                       |   | *   |
|          |       | 151                                                   |   | 200 |
| YidC2_BH | (151) | FAIMRTEEIR-----                                       |   |     |
| YidC_MT  | (124) | HVLRSFNRRTGGFGQPHLSVIENRLTGNYVFSVPDVGHFLDANLFGAPIG    |   |     |
|          |       | 201                                                   |   | 250 |
| YidC2_BH | (161) | -----YHTFLWFDLQPDYILP-----FVAGITTYFQFKMTMSHQQQMQ      |   |     |
| YidC_MT  | (174) | AYMTQRSGLDAFVDFSRPALIAVGVPVMI LAGIATYFNSRAS IARQSAEA  |   |     |
|          |       |                                                       |   | *   |
|          |       | 251                                                   |   | 300 |
| YidC2_BH | (200) | KTNPSDSDNPMANMMQMQMKVMLYVMPVMI I IAGLSLPSALS LYWVIGNI |   |     |
| YidC_MT  | (224) | AANP-----QTAMNKLALYVFP LGVVVGGPFLPLAI ILYWFSNNI       |   |     |
|          |       |                                                       |   | *   |
|          |       | 301                                                   |   | 350 |
| YidC2_BH | (250) | FMIIQTYFIVVKAPPLEVEQTK-----QKSKPNKA-----              |   |     |
| YidC_MT  | (265) | WTFGQQH YVFGMIEKEEAKKQEA VRRRAANAPAPGAKPKRS PKTAPATN  |   |     |
|          |       |                                                       | * |     |
|          |       | 351                                                   |   | 400 |
| YidC2_BH | (281) | -----                                                 |   |     |
| YidC_MT  | (315) | AAAPTEAGD TDDGAESDASTERPADTSNPARRNSGPSARTPRPGVVRPKKR  |   |     |
|          |       | 401                                                   |   |     |
| YidC2_BH | (281) | --                                                    |   |     |
| YidC_MT  | (365) | KR                                                    |   |     |

**Supplementary Figure 1. Comparative analysis of YidC homologous from *B. halodurans* and *Mtb*.** Alignment of *Mtb* YidC (YidC\_MT) with YidC2 of *B. halodurans* (YidC2\_BH). Amino acid sequences of the two proteins were aligned using AlignX program of Vector NTI software. The number in parentheses before each sequence represents the position of amino acid residue in the alignment. The numbers at the top of the alignment are the positions of the multiple sequence alignment. Color codes for amino acid residues at a given position are as follows: 1) red: identical residues; 2) green: similar residues; 3) black: non-similar residues. Positions of the residues that constitute cytoplasmic groove in the YidC2\_BH are marked by asterisks.

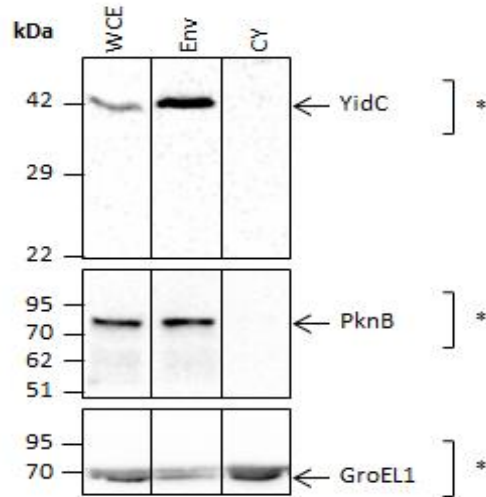

**Supplementary Figure 2. Analysis of localization of YidC in Mtb by immunoblotting.**

Localization of YidC was analyzed in wild-type Mtb by subjecting the different subcellular fractions to anti-YidC immunoblotting. Equal amount of proteins from the whole cell extract (WCE), envelope (Env) and cytoplasm (CY) fractions were resolved on denatured polyacrylamide gel and blotted under the same experimental conditions. Antibodies against proteins that are destined to the Env (PknB) or both Env and CY (GroEL1) were simultaneously used to assess the purity of fractions. The immunoblot reveals that YidC is localized in the envelope and not in the cell cytosol. Asterisks represent blot regions shown in Figure 1d.

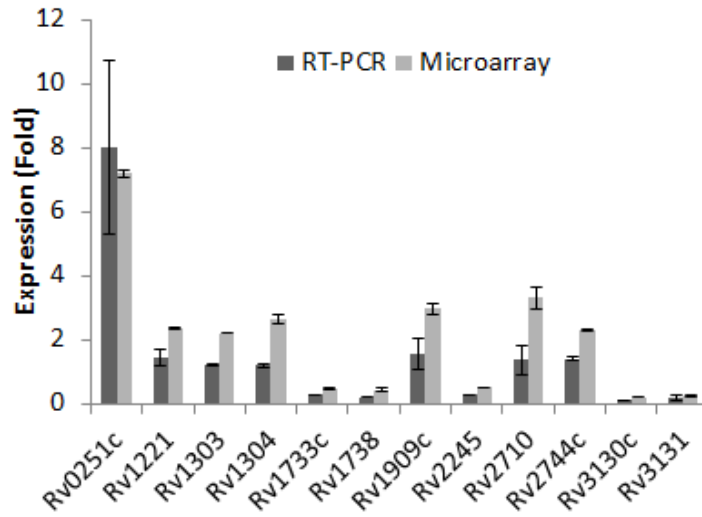

**Supplementary Figure 3. Verification of differential gene expression analysis during microarray by qRT-PCR.** Expression levels of randomly selected transcripts were analyzed by qRT-PCR in RNA preparations from control and *yidC(-)* strains used in microarray. Gene-specific primers amplifying ~200bp region of respective ORFs are listed in Table S1. Microarray expression values of the corresponding genes are plotted for a comparative analysis. Mean  $\pm$  s.d. of two independent experiments is shown.

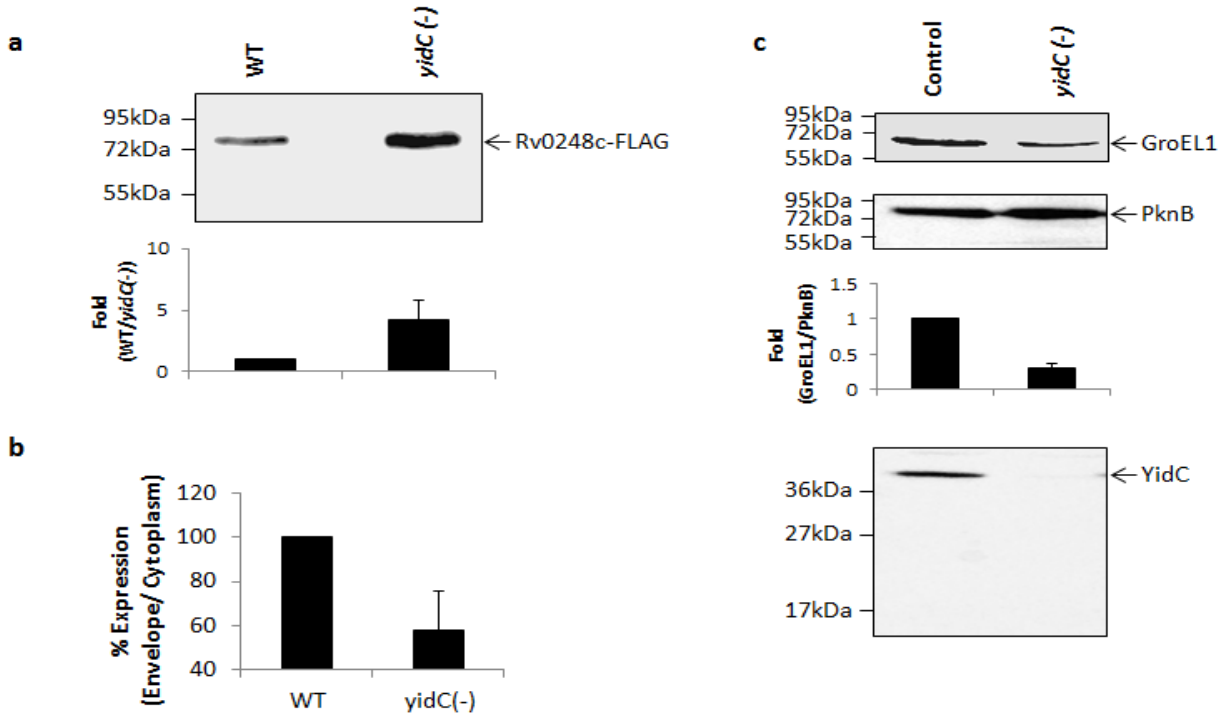

**Supplementary Figure 4. Immunoblot analysis demonstrating the effect of YidC depletion on expression of proteins in Mtb.** (a) Anti-FLAG immunoblotting with 20 $\mu$ g of WCE prepared from wild-type (WT) and *yidC(-)* strains harboring pTetR-Rv0248c-FLAG. As shown, suppression of YidC by 7 days of treatment with 50ng/ml ATc leads to ~4.2-fold more expression of Rv0248c-FLAG in the WCE. (b) Analysis of Rv0248c-FLAG expression levels in the envelope fraction of the WT and *yidC(-)* strains harboring pTetR-Rv0248c-FLAG, after normalization to its levels in the cytoplasmic fraction of the respective strains. Expression was determined by anti-FLAG immunoblotting with 10 $\mu$ g proteins, prepared after 7 days of treatment with 50ng/ml ATc. (c) Effect of YidC depletion on the expression of GroEL1. Shown are immunoblots with the WCEs of control and *yidC(-)* strains prepared after 7 days of treatment with 50ng/ml ATc probed with anti-GroEL1, anti-PknB and anti-YidC antibodies, respectively. A substantial decrease in the expression of YidC (>99%) and GroEL1 (~3-fold), but not of PknB in *yidC(-)* compared to control Mtb demonstrates a specific effect of YidC depletion on GroEL1 expression. Expression levels were quantitated by densitometric analysis, as presented by bar graph in (a-c). Data represent two independent experiments in (a-c).

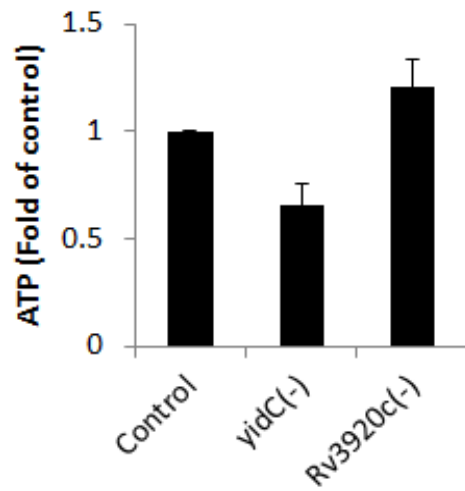

**Supplementary Figure 5. Effects of depletion of Rv3920c on cellular ATP levels.** ATP concentration was estimated after depletion of Rv3920c in Mtb, as described in Methods. Comparison of ATP levels in knockdown strain with control indicates no effect of suppression of Rv3920c on ATP production in Mtb. Mean  $\pm$  s.d. of two experiments is shown.

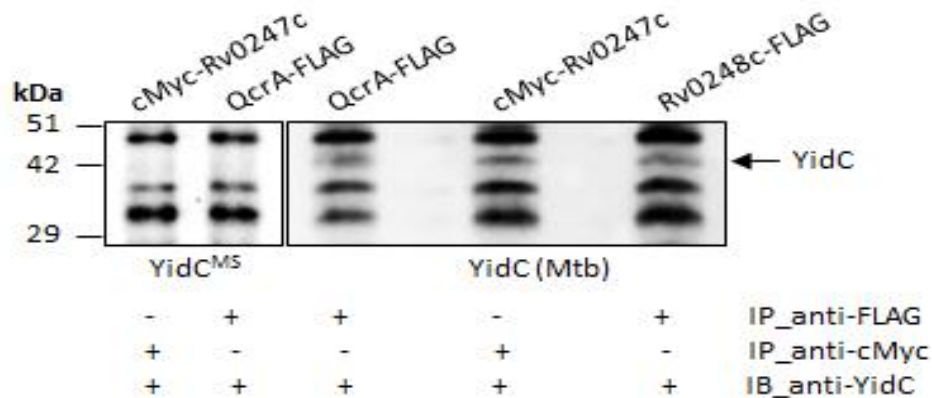

**Supplementary Figure 6. Interaction of YidC<sup>MS</sup> with QcrA and Rv0247c.** *M. smegmatis* lysates expressing QcrA-FLAG or cMyc-Rv0247c were immunoprecipitated with anti-FLAG or anti-cMyc antibodies, respectively, followed by immunoblotting with anti-YidC antibodies. Absence of YidC in immunoprecipitated samples indicates no association of *M. smegmatis* YidC (YidC<sup>MS</sup>) with any of the QcrA or Rv0247c proteins (lanes 1-2). In contrast, when immunoprecipitation of QcrA-FLAG, Rv0248c-FLAG or cMyc-Rv0247c-expressing lysates was performed in the presence of cell lysates expressing YidC of Mtb, YidC was detected in all the three samples (lanes 3-5), indicating specific interaction of Mtb YidC with these proteins. To confirm immunoprecipitation of IgGs, blots were developed with SuperSignal West Femto maximum sensitivity chemiluminescent substrate (Thermo Pierce), which also detected IgG heavy and light chains. Data represent two independent experiments.

|           |       |                                                                                                  |  |                                                        |
|-----------|-------|--------------------------------------------------------------------------------------------------|--|--------------------------------------------------------|
|           |       | 1                                                                                                |  | 100                                                    |
| YidC_Maf  | (1)   | MSLLDFDFSLDFIYYPVSWIMWVYRLFAFVLGSPNFFAWALSVMFLVFTLRALLYKPFVRQIRTTROMQELQPQIKALQKQYKDRQRMALQKLORE |  |                                                        |
| YidC_Mbo  | (1)   | MSLLDFDFSLDFIYYPVSWIMWVYRLFAFVLGSPNFFAWALSVMFLVFTLRALLYKPFVRQIRTTROMQELQPQIKALQKQYKDRQRMALQKLORE |  |                                                        |
| YidC_Bcg  | (1)   | MSLLDFDFSLDFIYYPVSWIMWVYRLFAFVLGSPNFFAWALSVMFLVFTLRALLYKPFVRQIRTTROMQELQPQIKALQKQYKDRQRMALQKLORE |  |                                                        |
| YidC_Mcan | (1)   | MSLLDFDFSLDFIYYPVSWIMWVYRLFAFVLGSPNFFAWALSVMFLVFTLRALLYKPFVRQIRTTROMQELQPQIKALQKQYKDRQRMALQKLORE |  |                                                        |
| YidC_Mcap | (1)   | MSLLDFDFSLDFIYYPVSWIMWVYRLFAFVLGSPNFFAWALSVMFLVFTLRALLYKPFVRQIRTTROMQELQPQIKALQKQYKDRQRMALQKLORE |  |                                                        |
| YidC_Mmi  | (1)   | MSLLDFDFSLDFIYYPVSWIMWVYRLFAFVLGSPNFFAWALSVMFLVFTLRALLYKPFVRQIRTTROMQELQPQIKALQKQYKDRQRMALQKLORE |  |                                                        |
| YidC_Mtu  | (1)   | MSLLDFDFSLDFIYYPVSWIMWVYRLFAFVLGSPNFFAWALSVMFLVFTLRALLYKPFVRQIRTTROMQELQPQIKALQKQYKDRQRMALQKLORE |  |                                                        |
|           |       | 101                                                                                              |  | 200                                                    |
| YidC_Maf  | (101) | HGFNPILGCLPMLAQIPVFLGLYHVLRSFNRTTGGFGQPPLSVIENRLTGNVYFSPVDVGHFLDANLFGAPIGAYMTQRSGLD              |  | FVDFSRPALI                                             |
| YidC_Mbo  | (101) | HGFNPILGCLPMLAQIPVFLGLYHVLRSFNRTTGGFGQPPLSVIENRLTGNVYFSPVDVGHFLDANLFGAPIGAYMTQRSGLD              |  | FVDFSRPALI                                             |
| YidC_Bcg  | (101) | HGFNPILGCLPMLAQIPVFLGLYHVLRSFNRTTGGFGQPPLSVIENRLTGNVYFSPVDVGHFLDANLFGAPIGAYMTQRSGLD              |  | FVDFSRPALI                                             |
| YidC_Mcan | (101) | HGFNPILGCLPMLAQIPVFLGLYHVLRSFNRTTGGFGQPPLSVIENRLTGNVYFSPVDVGHFLDANLFGAPIGAYMTQRSGLD              |  | FVDFSRPALI                                             |
| YidC_Mcap | (101) | HGFNPILGCLPMLAQIPVFLGLYHVLRSFNRTTGGFGQPPLSVIENRLTGNVYFSPVDVGHFLDANLFGAPIGAYMTQRSGLD              |  | FVDFSRPALI                                             |
| YidC_Mmi  | (101) | HGFNPILGCLPMLAQIPVFLGLYHVLRSFNRTTGGFGQPPLSVIENRLTGNVYFSPVDVGHFLDANLFGAPIGAYMTQRSGLD              |  | FVDFSRPALI                                             |
| YidC_Mtu  | (101) | HGFNPILGCLPMLAQIPVFLGLYHVLRSFNRTTGGFGQPPLSVIENRLTGNVYFSPVDVGHFLDANLFGAPIGAYMTQRSGLD              |  | FVDFSRPALI                                             |
|           |       | 201                                                                                              |  | 300                                                    |
| YidC_Maf  | (201) | MILAGIATYFNSRASIARQSAEAAANPQTAMMN                                                                |  | LALYVFPLGVVGGPFLPLAIILYWFSSNNIWTFGQQHYVFGMIEKEEEAKKQEA |
| YidC_Mbo  | (201) | MILAGIATYFNSRASIARQSAEAAANPQTAMMN                                                                |  | LALYVFPLGVVGGPFLPLAIILYWFSSNNIWTFGQQHYVFGMIEKEEEAKKQEA |
| YidC_Bcg  | (201) | MILAGIATYFNSRASIARQSAEAAANPQTAMMN                                                                |  | LALYVFPLGVVGGPFLPLAIILYWFSSNNIWTFGQQHYVFGMIEKEEEAKKQEA |
| YidC_Mcan | (201) | MILAGIATYFNSRASIARQSAEAAANPQTAMMN                                                                |  | LALYVFPLGVVGGPFLPLAIILYWFSSNNIWTFGQQHYVFGMIEKEEEAKKQEA |
| YidC_Mcap | (201) | MILAGIATYFNSRASIARQSAEAAANPQTAMMN                                                                |  | LALYVFPLGVVGGPFLPLAIILYWFSSNNIWTFGQQHYVFGMIEKEEEAKKQEA |
| YidC_Mmi  | (201) | MILAGIATYFNSRASIARQSAEAAANPQTAMMN                                                                |  | LALYVFPLGVVGGPFLPLAIILYWFSSNNIWTFGQQHYVFGMIEKEEEAKKQEA |
| YidC_Mtu  | (201) | MILAGIATYFNSRASIARQSAEAAANPQTAMMN                                                                |  | LALYVFPLGVVGGPFLPLAIILYWFSSNNIWTFGQQHYVFGMIEKEEEAKKQEA |
|           |       | 301                                                                                              |  | 366                                                    |
| YidC_Maf  | (301) | AKPKRSPKTAPATNAAAPTEAGDTDDGAESDASTERPADT                                                         |  | SNPARRNSGPSARTPRPGVRF                                  |
| YidC_Mbo  | (301) | AKPKRSPKTAPATNAAAPTEAGDTDDGAESDASTERPADT                                                         |  | SNPARRNSGPSARTPRPGVRF                                  |
| YidC_Bcg  | (301) | AKPKRSPKTAPATNAAAPTEAGDTDDGAESDASTERPADT                                                         |  | SNPARRNSGPSARTPRPGVRF                                  |
| YidC_Mcan | (301) | AKPKRSPKTAPATNAAAPTEAGDTDDGAESDASTERPADT                                                         |  | SNPARRNSGPSARTPRPGVRF                                  |
| YidC_Mcap | (301) | AKPKRSPKTAPATNAAAPTEAGDTDDGAESDASTERPADT                                                         |  | SNPARRNSGPSARTPRPGVRF                                  |
| YidC_Mmi  | (301) | AKPKRSPKTAPATNAAAPTEAGDTDDGAESDASTERPADT                                                         |  | SNPARRNSGPSARTPRPGVRF                                  |
| YidC_Mtu  | (301) | AKPKRSPKTAPATNAAAPTEAGDTDDGAESDASTERPADT                                                         |  | SNPARRNSGPSARTPRPGVRF                                  |

**Supplementary Figure 7. Alignment of YidC protein sequences from different bacteria of *M. tuberculosis* complex.** Homologues of Mtb YidC (Mtu) were identified by Blastp homology searches in other Mtb complex bacteria such as *M. africanum* (Maf), *M. bovis* (Mbo), *M. bovis* BCG (Bcg), *M. canettii* (Mcan), *M. caprae* (Mcap) and *M. microti* (Mmi) that were aligned using AlignX program of Vector NTI software (Invitrogen) according to the manufacturer's recommendations. The number in parentheses before each sequence represents the position of amino acid residue of YidC protein sequence in the alignment. The numbers at the top of the alignment are the positions of the multiple sequence alignment. Color codes for amino acid residues at a given position are as follows: 1) red on yellow: identical residues; 2) black on green: block of similar residues; 3) blue on cyan: conserved residues; 4) green on white: residues weakly similar to consensus residue.



**Supplementary Table 1. Bacterial strains and plasmids used in this study.**

| <b>A. Bacterial strains</b> |                                                      |                                                                                                                              |                  |
|-----------------------------|------------------------------------------------------|------------------------------------------------------------------------------------------------------------------------------|------------------|
| <b>S. No.</b>               | <b>Strain</b>                                        | <b>Source</b>                                                                                                                |                  |
| 1.                          | <i>Mycobacterium smegmatis</i> mc <sup>2</sup> 155   | Dr. William Jacobs, Albert Einstein College of Medicine, USA                                                                 |                  |
| 2.                          | <i>Mycobacterium tuberculosis</i> H <sub>37</sub> Rv | Dr. William Bishai, Johns Hopkins University, USA                                                                            |                  |
| 3.                          | <i>Escherichia coli</i> DH5α                         | Dr. William Bishai, Johns Hopkins University, USA                                                                            |                  |
| <b>B. Plasmids</b>          |                                                      |                                                                                                                              |                  |
| <b>S. No.</b>               | <b>Name</b>                                          | <b>Description</b>                                                                                                           | <b>Reference</b> |
| 1.                          | pTetInt- <i>dcas9</i>                                | Mycobacteria- <i>E. coli</i> shuttle plasmid integrated into mycobacterial genome for the ATc inducible expression of dCas9. | 37               |
| 2.                          | pTetR                                                | Replicative Mycobacteria- <i>E. coli</i> shuttle plasmid for ATc inducible expression of different genes in mycobacteria.    | 37               |
| 3.                          | pGrna                                                | Derivative of pTetR for ATc inducible expression of gene-specific guide RNA in mycobacteria.                                 | 37               |
| 4.                          | pGrna- <i>yidC</i>                                   | Derivative of pGrna for ATc inducible expression of <i>yidC</i> -specific guide RNA.                                         | 37               |
| 5.                          | pGrna- <i>Rv3920c</i>                                | Derivative of pGrna for ATc inducible expression of <i>Rv3920c</i> -specific guide RNA.                                      | This study       |
| 6.                          | pTetR-GFP                                            | Derivative of pTetR for ATc inducible expression of GFP in mycobacteria.                                                     | This study       |
| 7.                          | pTetR-YidC-GFP                                       | Derivative of pTetR for ATc inducible expression of YidC-GFP fusion protein in mycobacteria.                                 | This study       |
| 8.                          | pTetR-YidC                                           | Derivative of pTetR for ATc inducible expression of YidC in mycobacteria.                                                    | This study       |
| 9.                          | pTetR-Rv0248c-FLAG                                   | Derivative of pTetR for ATc inducible expression of Rv0248c-FLAG fusion protein in mycobacteria.                             | This study       |
| 10.                         | pTetR-QcrA-FLAG                                      | Derivative of pTetR for ATc inducible expression of QcrA-FLAG fusion protein in mycobacteria.                                | This study       |
| 11.                         | pTetR-cMyc-Rv0247c                                   | Derivative of pTetR for ATc inducible expression of cMyc-Rv0247c fusion protein in mycobacteria.                             | This study       |

**Supplementary Table 2. List of primers used in study.**

| S. No | Primer | Sequence (5'-3')                                                             | Reference                                  |
|-------|--------|------------------------------------------------------------------------------|--------------------------------------------|
| 1     | Pr1    | CCGCATATGTTAATTAACGGTGGCGGTGGCGGTGGAGGTGGTGGGATGAGTAAAGGAGAAGAAGCTTTTC       | Cloning of <i>gfp</i>                      |
| 2     | Pr2    | GCCAAGCTTTTATTTGTATAGTTCATCCATGCCATG                                         |                                            |
| 3     | Pr3    | GATCCATATGAGTCTTTTGTGTTGATTTTC                                               | Cloning of <i>gidC</i> in pTetR-GFP        |
| 4     | Pr4    | GCGCTTAATTAACGTTTTCGGTTTTTTTCGGTTCGCACC                                      |                                            |
| 5     | Pr3    | GATCCATATGAGTCTTTTGTGTTGATTTTC                                               | Cloning of <i>gidC</i> in pTetR            |
| 6     | Pr5    | GCGCAAGCTTTCAACGTTTTCGGTTTTTTTCGGTC                                          |                                            |
| 7     | Pr6    | GGCATATGACGTACAGCGCGAGTATGCG                                                 | Cloning of <i>Rv0247c</i> in pTetR         |
| 8     | Pr7    | GGTCTAGAGCGGCGAAACAGCTTGCTGC                                                 |                                            |
| 9     | Pr8    | AGAAGCTTGTGAGGTCGAGCGGCACTC                                                  | Cloning of <i>Rv0248c</i> in pTetR         |
| 10    | Pr9    | GGTCTAGAGCCTCTCCGCTCGGATGCTC                                                 |                                            |
| 11    | Pr10   | GGCATATGAGCCGCGCCGACGACGATG                                                  | Cloning of <i>qcrA</i> in pTetR            |
| 12    | Pr11   | GGTCTAGACTTAATTAATGTTGTTGTTTCGCTCCCAGAATG                                    |                                            |
| 13    | Pr11   | CTAGAGACTACAAGGACCACGCGGTGACTACAAGGACCACGACATCGACTACAAGGACGACGACACAAGTGA     | Cloning of FLAG gene expression cassette   |
| 14    | Pr12   | CTAGTCACTTGTCGTCGTCGTCCTTGTAGTCGATGTCGTTGGTCCTTGTAGTCACCGTCGTTGGTCCTTGTAGTCT |                                            |
| 15    | Pr13   | TAATGGAACAAAACTTATTTCTGAAGAAGATCTGCA                                         | Cloning of cMyc gene expression cassette   |
| 16    | Pr14   | TATGCAGATCTTCTTCAGAAATAAGTTTTGTTCCAT                                         |                                            |
| 17    | Pr15   | CTTCTGATGCACCGCCAAC                                                          | Cloning of <i>Rv3920c</i> -specific sgRNAs |
| 18    | Pr16   | CGGTTGGCGGTGCATCAGAAGCATG                                                    |                                            |
| 19    | Pr17   | GTTTGATTTCTTCAGTCTCG                                                         | qRT-PCR analysis of <i>gidC</i>            |
| 20    | Pr18   | TTGATCTGTGGTTGCAGTTC                                                         |                                            |
| 21    | Pr19   | ATGGCCAATCCGTTTCGTTAAAGC                                                     | qRT-PCR analysis of <i>pspA</i>            |
| 22    | Pr20   | GCATCTCCAATTGACGCTGG                                                         |                                            |
| 23    | Pr21   | CAATCTCGCATTGTGGTCGC                                                         | qRT-PCR analysis of <i>Rv0251c</i>         |
| 24    | Pr22   | TTGTGACGTCGAATGCCGGG                                                         |                                            |
| 25    | Pr23   | CGGGTTGGGAATACGGAATCG                                                        | qRT-PCR analysis of <i>Rv1221</i>          |
| 26    | Pr24   | CCTGCAATTGGTCAGACGGC                                                         |                                            |
| 27    | Pr25   | TGCCCTGCTGGTGCGGCGTTC                                                        | qRT-PCR analysis of <i>Rv1303</i>          |
| 28    | Pr26   | CGTCGTTGCCACCAGCAGCAC                                                        |                                            |
| 29    | Pr27   | CACCATTGATGCGCAATCAGG                                                        | qRT-PCR analysis of <i>Rv1304</i>          |
| 30    | Pr28   | ATTGATGTCCGCTGCTGCCG                                                         |                                            |
| 31    | Pr29   | GGTCTCGCTGCTGACTATCC                                                         | qRT-PCR analysis of <i>Rv1733c</i>         |
| 32    | Pr30   | TATTCCGTTACGACCCATC                                                          |                                            |
| 33    | Pr31   | CATATCGATCGACGAACACG                                                         | qRT-PCR analysis of <i>Rv1738</i>          |
| 34    | Pr32   | GGGTCGACACCTTCAACATT                                                         |                                            |
| 35    | Pr33   | CCTCTATACCGGACTACGCC                                                         | qRT-PCR                                    |

|    |      |                          |                                    |
|----|------|--------------------------|------------------------------------|
| 36 | Pr34 | AGGGTTGGATCTTTTCGCACC    | analysis of <i>Rv1909c</i>         |
| 37 | Pr35 | ATCCACGCACTCGAAGACGAG    | qRT-PCR analysis of <i>Rv2245</i>  |
| 38 | Pr36 | GAACCGGTCTGGATCGACCT     |                                    |
| 39 | Pr37 | GGGTTGACAGCGATCTGGATGC   | qRT-PCR analysis of <i>Rv2710</i>  |
| 40 | Pr38 | GGTCGCGTTTTTCGGTTCTCG    |                                    |
| 41 | Pr39 | ATGGCCAATCCGTTTCGTTAAAGC | qRT-PCR analysis of <i>Rv2744c</i> |
| 42 | Pr40 | GCATCTCCAATTGACGCTGG     |                                    |
| 43 | Pr41 | GGATTCCGTGTCAATCCAAG     | qRT-PCR analysis of <i>Rv3130c</i> |
| 44 | Pr42 | GATGGTGACGTCGAATTTCC     |                                    |
| 45 | Pr43 | GACCGACGAGGAATATCTGC     | qRT-PCR analysis of <i>Rv3131</i>  |
| 46 | Pr44 | CGTCTGTCTCGGTGCCTAGT     |                                    |
